# Supplementary material
Source: Research Square preprint supplement (doi:10.21203/rs.3.rs-9115023/v1)
Supplement: Supplementary file 1 [file 3c7a7e0e312a1ec1f43ec168.pdf]

**The Psychology of Reification: Perceiving Social Reality as Mind-Independent**

**Study 1**

**Methods**

**Participants**

Participants were recruited from the Prolific platform, comprising 301 English-speaking U.S. residents (156 men and 145 women). Eligibility criteria included English as a first language, and declaring fluent language, a minimum of 50 prior submissions on the Prolific platform, and an approval rate exceeding 95%. Participants provided informed consent prior to participation.

Participants answered four preliminary clarification questions related to the mind-dependence concept to ensure comprehension. Participants who failed to demonstrate adequate understanding were excluded from the subsequent analysis. Likewise, participants that failed one or more of the attention checks were also excluded. Of the 301 initial participants, 32 failed the attention checks and an additional 53 did not correctly answer all four clarification questions. These participants were excluded from further analysis, leaving a final sample of 216 participants.

**Procedure**

Participants responded to 18 statements regarding various social facts, such as "Overweight people face discrimination" and "Flowers are used for decoration", presented in a randomized order. Each statement was followed by a series of evaluations: (1) the truthfulness of the statement, (2) confidence in the truthfulness of the assessment, (3) five questions about the perception of the statement's mind-dependence, and (4) naturalness, stability, and inherency to our world.

Upon completion of the statement evaluations, participants completed the 12 Item Social and Economic Conservatism Scale (SECS; <sup>1</sup>) questionnaire, a brief version of the Big Five Inventory consisting of 10 items (BFI; <sup>2</sup>), and demographic questions.

**Analysis**

Under the hypothesis that mind dependence constitutes a distinct construct from those forming the basis of essentialism, our study hypothesizes that evaluations of social facts concerning their mind dependency, naturalness, stability, and inherency to our world will manifest as two separate constructs: mind-dependence and essentialist traits (i.e., naturalness, stability, and inherency). Mind-dependence is an attribution specific to each individual and statement; thus, to mitigate idiosyncratic influences, we standardized the data relative to both

37 participants and statements. Subsequently, a factor analysis was conducted to test this  
38 hypothesis.

39 Further, we employed Hierarchical Linear Modeling (HLM) approach to examine  
40 intraclass correlations (ICCs), thereby illuminating variances across different statements and  
41 between participants. Model 1 was specified as follows:

$$42 \quad \textit{Mind-Dependence} \sim 1 + (1 \mid \textit{Person}) + (1 \mid \textit{Statement}) + (1 \mid \textit{Question}).$$

43

44 The interaction between person and statement will reveal the varying patterns of mind-  
45 dependence attribution across different individuals and statements. To investigate this effect,  
46 we compared Model 1 with Model 2, where Model 2 also incorporates an interaction term:

47

$$48 \quad \textit{Mind-Dependence} \sim 1 + (1 \mid \textit{Person}) + (1 \mid \textit{Statement}) + (1 \mid \textit{Person}:\textit{Statement}) + (1 \mid$$
  
$$49 \quad \quad \quad \textit{Question}).$$

50

51 We used a base factor to compare the two models.

52 Additionally, to demonstrate that mind-dependence is not perceived in a binary manner  
53 but rather exhibits a gradation, we visualized the distribution of mind-dependency attributions.

54 The hypotheses and the detailed analysis plan have been pre-registered and are  
55 accessible at: <https://aspredicted.org/p924-kcxb.pdf>.

56

## 57 **Results**

### 58 **Factor analysis**

59 The suitability of the data for factor analysis was initially confirmed by Bartlett's test  
60 of sphericity, which indicated a significant correlation within the data ( $\chi^2(28) = 14,145.99$ ,  $p <$   
61  $.001$ ). The exploratory factor analysis, using various methods to determine the number of  
62 factors, consistently suggested the extraction of two factors. Specifically, the scree test results  
63 from the acceleration factor, the optimal coordinates, parallel analysis, and Kaiser criterion all  
64 supported a two-factor model.

65 Rotated component matrix, using an oblimin rotation, revealed distinct loadings for the  
66 two factors, which together explained 56.50% of the total variance in the data (Figure S1).  
67 Aligned with our hypothesis, the first factor (mind-dependence), accounting for 37.90% of the  
68 variance, strongly loaded on Believe (0.84), Think (0.83), Want (0.82), Desire (0.77), and  
69 counter-factuality (0.61). The second factor (essentialism) explaining 18.6% of the variance,  
70 included significant loadings on Inherency (0.78), Naturalness (0.71), and Stability (0.60). The  
71 inter-factor correlation was ( $r = -0.10$ )

### 72 **Hierarchical Linear Modelling (HLM) Analysis**

73 The intra-class correlation coefficients (ICCs) of model 1 revealed substantial  
74 variability attributed to individual differences, with an ICC of 0.316 for Person, indicating that  
75 approximately 31.60% of the variance in mind-dependence scores could be attributed to  
76 differences between individuals. The variance attributed to statement differences was notably  
77 smaller, with an ICC of 0.080, accounting for about 8.00% of the variance. Further examination  
78 suggested significant contributions of both random effects to the model. Removing the random  
79 effect of Person from the model resulted in a substantial increase in the Akaike Information  
80 Criterion (AIC) from 79,403 to 86,706, with a likelihood ratio test (LRT) statistic of 7304.60  
81 ( $p < .001$ ). Similarly, excluding the random effect of Statement led to an increase in AIC to  
82 81,596 and an LRT statistic of 2195.40 ( $p < .001$ ), both indicative of the significance of these  
83 components in the model.

84 To assess the significance of the interaction between individual participants and  
85 statements, we compared Model 1, which did not include an interaction term, with Model 2,  
86 which did. The ICC showed that this interaction (Person:Statement) accounted for 31.70% of  
87 the total variance, underscoring its substantive influence alongside the contributions from  
88 individual participants (30.10%), and Statements (7.80%). The comparison of Model 1 with  
89 Model 2 revealed a significant improvement in model fit with the inclusion of the interaction  
90 term  $\chi^2(1) = 6585.4, p < .001$ . The AIC and Bayesian Information Criterion (BIC) were notably  
91 lower for Model 2; AIC = 72818, BIC = 72865 compared to Model 1 where the AIC = 79401  
92 and the BIC = 79441. Additionally, the bayes factor (BF), computed using the BIC  
93 approximation, strongly favored the model including the interaction term, with a BF < .001,  
94 against Model 1. This substantial BF indicates a strong preference for the model accounting for  
95 interactions between individuals and statements over the model without these interactions.  
96

**Figure S1. Factor Analysis of Mind-dependence and Essentialism of Social State-of-Affairs**

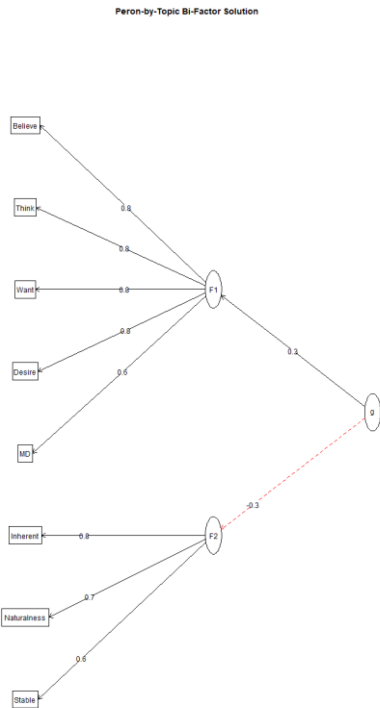

*Note.* Factor analysis method used oblimin rotation.

97

98

## Study 2

### 99 Methods

#### 100 Participants

101 A total of 250 participants were initially invited to complete the mind-dependence  
 102 questionnaire that included ratings across 10 distinct topics, presented in randomized order.  
 103 Participants who failed an attention check or did not respond appropriately to clarification  
 104 questions designed to assess understanding of the key questions, were excluded from further  
 105 participation. After these exclusions, a total of 182 participants were retained and invited to  
 106 participate in a second session one week later, during which they completed the same  
 107 questionnaire. To the second session, 148 participants responded. Following the same exclusion  
 108 criteria as in the first session, an additional 21 participants were excluded, resulting in a final  
 109 sample of 127 participants who completed both sessions.

#### 110 Procedure

111 The study was designed to evaluate the temporal stability of mind-dependence  
 112 judgments using a one-week test–retest design. Participants first completed a clarification phase  
 113 to ensure comprehension of the mind-dependence questions. This phase included a set of  
 114 conceptual clarification questions identical to those used in the previous study. Participants who  
 115 failed to correctly answer any of these items were excluded in accordance with the pre-  
 116 registered criteria.

117 At Time 1, participants evaluated ten social state-of-affairs selected to represent a  
118 diverse sample of social facts. The ten statements were presented in randomized order for each  
119 participant. For every statement, participants provided: (a) a truth assessment; (b) a confidence  
120 rating; (c) five items measuring perceived mind-dependence (e.g., whether the truth of the  
121 statement depends on what people think, believe, desire, or want). During this first session,  
122 participants also completed a brief attention-check to ensure engagement.

123 One week later, all eligible participants were re-contacted to complete a second session  
124 (Time 2). In this session, participants were presented with the same ten statements, in newly  
125 randomized order, and completed the identical sequence of ratings. No feedback was provided  
126 regarding their prior responses, and participants were not informed that the goal of the study  
127 was to assess response consistency across time. As in the first session, participants who failed  
128 clarification items or the attention check were excluded according to the preregistered rules.

## 129 **Analysis**

130 All analyses were pre-registered (see, <https://aspredicted.org/xv4u9p.pdf>). To assess  
131 the test-retest reliability of the mind-dependence ratings, we employed two complementary  
132 analytic strategies. First, we computed Pearson correlations between Time 0 and Time 1 ratings  
133 separately for each of the 10 topics. Second, we estimated generalizability coefficients using  
134 hierarchical linear modeling (Shrout & Lane, 2012), enabling us to partition the variance in  
135 mind-dependence judgments into person-level, topic-level, and interaction-level components  
136 across time. Specifically, we calculated: (a) an overall reliability coefficient reflecting  
137 consistency in individual responding across all topics and timepoints; and (b) a coefficient  
138 reflecting the reliability of topic-specific differential responding by each participant.

## 139 **Results**

### 140 **Test-Retest Correlations**

141 Correlations between Time 1 and Time 2 ratings for individual topics ranged from  $r =$   
142 0.475 (for the item: “Females are the primary caregivers for the child”) to  $r = 0.725$  (for the  
143 item: “When a person dies a funeral is held”). The mean test-retest correlation across all topics  
144 was  $r = 0.640$ , suggesting a moderate-to-high degree of temporal stability in participants’  
145 ratings (see Table 1S for all topic-wise correlations).

**Table S1. Test-Retest Correlations by Topic**

| <b>State of affairs</b> | <b>Test-Retest Correlation (r)</b> |
|-------------------------|------------------------------------|
| Age                     | 0.639                              |
| DIE                     | 0.725                              |
| DOG                     | 0.696                              |
| FIS                     | 0.611                              |
| FM                      | 0.475                              |

|     |       |
|-----|-------|
| FW  | 0.688 |
| ISR | 0.661 |
| OWP | 0.647 |
| SKI | 0.581 |
| TWI | 0.676 |

*Note.* Values represent Pearson correlation coefficients between Time 0 and Time 1 ratings for each topic.

146

147 **Hierarchical Linear Modeling and Generalizability Coefficients**

148 Variance components estimated from the hierarchical linear model indicated substantial  
 149 between-person variability ( $SD = 1.35$ ), with additional variability attributable to topic-level  
 150 ( $SD = 0.59$ ) and participant-by-topic interaction effects ( $SD = 0.79$ ). The variance component  
 151 for topic-by-time interactions was negligible ( $SD = 0.00$ ), suggesting minimal systematic  
 152 change at the topic level over time (see Table S2 for all results).

153 Based on these estimates, we computed generalizability coefficients ( $R_{IR}$ ) at three  
 154 levels of analysis. The coefficient for participant-level reliability ( $R_{IR-participant} = 0.797$ ) indicates  
 155 high stability in individuals' overall mind-dependence judgments across topics and time points.  
 156 The coefficient for State-of-affairs-level reliability ( $R_{IR-state-of-affairs} = 0.890$ ) reveals a similarly  
 157 high degree of consistency in how different topics are judged across participants and time,  
 158 underscoring the reliability of State-of-affairs-level. Finally, the coefficient for participant-by-  
 159 State-of-affairs interactions ( $R_{IR-interaction} = 0.305$ ) reflects a more modest level of stability in  
 160 how individuals differentially judge specific topics over time.

161

**Table S2. Hierarchical Linear Model Estimates for Mind-Dependence Scores**

| Effect type   | Parameter                         | Estimate | SE   | 95% CI      | t     | p         |
|---------------|-----------------------------------|----------|------|-------------|-------|-----------|
| Fixed effect  | Intercept                         | 4.26     | 0.27 | [3.74,4.78] | 15.98 | <.001     |
|               |                                   |          |      |             |       | <b>SD</b> |
| Random effect | Intercept (ID)                    |          |      |             |       | 1.35      |
|               | Intercept (State-of-affairs)      |          |      |             |       | 0.59      |
|               | Intercept (Time)                  |          |      |             |       | 0.2       |
|               | Intercept (ID: State-of-affairs)  |          |      |             |       | 0.79      |
|               | Intercept (ID:Time)               |          |      |             |       | 0.58      |
|               | Intercept (State-of-affairs:Time) |          |      |             |       | 0.00      |
|               | Residual                          |          |      |             |       | 1.01      |

---

*Note.* The fixed effect reflects the average mind-dependence score across all topics and time points. Random effects capture variability across participants, topics, and time, including cross-level interactions. Confidence intervals and p-values for fixed effects were computed using a Wald t-distribution approximation.

### Study 3

163

#### 164 **Methods**

#### 165 **Participants**

166 This study involved 150 participants (63 men and 87 women) recruited through the  
167 Prolific platform, all of whom were from the United States with English as their primary  
168 language. Eligibility criteria required participants to have at least 50 previous submissions on  
169 Prolific with an approval rate exceeding 95%.

170 After providing informed consent, participants completed four initial clarifying  
171 questions to confirm their understanding of the study tasks. Those who failed to demonstrate  
172 adequate comprehension were excluded from further analysis. Then, participants continued to  
173 the main task. In addition, participants who failed one or more attention checks were excluded  
174 from the analysis. Of the 150 initial participants, 16 failed the attention checks and an additional  
175 30 did not correctly answer all four clarification questions. These participants were excluded  
176 from further analysis, leaving a final sample of 104 participants

#### 177 **Procedure**

178 The primary task involved presenting participants with 20 statements, corresponding  
179 to 10 topics, in a randomized order. Each topic (e.g., Dogs) featured a pair of statements: one  
180 reflecting a natural fact (e.g., "Dogs can't fly") and another representing a social fact (e.g.,  
181 "Dogs are pets"; see Table S3). Participants responded to each statement by firstly, stating  
182 whether the statement is true, reporting their confidence in their response, and subsequently  
183 evaluating mind-dependence and essentialism. Following the main task, participants completed  
184 the 12-item Social and Economic Conservatism Scale (SECS; <sup>1</sup>), the short 10-item Big Five  
185 Inventory (BFI; <sup>2</sup>), and a demographic questionnaire.

186

**Table S3. Social and Natural state of affairs**

| N | Topic      | Social fact                                      | Natural Fact                                     |
|---|------------|--------------------------------------------------|--------------------------------------------------|
| 1 | Overweight | Overweight people face discrimination            | Overweight people face health risks              |
| 2 | Dying      | When a person dies a funeral is held             | When a person dies their brain stops functioning |
| 3 | Females    | Females are the primary caregivers for the child | Females give birth                               |
| 4 | Flowers    | Flowers are used for decoration                  | Flowers cannot bloom without water               |
| 5 | Dogs       | Dogs are pets                                    | Dogs can't fly                                   |

|    |                 |                                                          |                                                                        |
|----|-----------------|----------------------------------------------------------|------------------------------------------------------------------------|
| 6  | Identical twins | Identical twins cannot marry each other                  | Identical twins have the same genes                                    |
| 7  | Fish            | Fish are eaten at restaurants                            | Fish can breathe underwater                                            |
| 8  | Age of 18       | The legal voting age in the US is 18                     | Puberty occurs before the age of 18                                    |
| 9  | Skin Color      | People often stereotype others based on their skin color | Skin color varies between people, and is mostly determined by genetics |
| 10 | Israel          | Israel is a UN member                                    | Israel is located in the middle east                                   |

187

## 188 **Analysis**

189 We employed Hierarchical Linear Modeling (HLM) approach to examine the  
190 differences between the mind dependency attributed to social facts compared to natural facts  
191 (Fact-type). The model was set as follows:

$$192 \text{ Mind-Dependence} \sim 1 + \text{Fact-type} + (\text{Fact-type} | \text{Person}) + (\text{Fact-type} | \text{Topic}) + (\text{Fact-type} |$$

$$193 \text{ Person:Topic}) + (\text{Fact-type} | \text{Question}).$$

194 The fixed effect of Fact-type (Social versus Natural) was used to estimate the  
195 hypothesis that people perceive social facts as significantly more mind-dependent than natural  
196 facts.

197 Further, to explore the hypothesis that the variance of mind-dependence attribution is  
198 greater for social facts than for natural facts, both within topics (i.e., there is a greater variance  
199 in mind dependency for social versus natural facts per topic), and within person (i.e., people  
200 have greater variance in the mind-dependency they attribute for social facts as opposed to  
201 natural facts), we utilized the HLM model and bootstrapping using a parametric method and  
202 200 resamples of the data to estimate the different variances, and to compare them. The analysis  
203 plan and all hypotheses have been pre-registered and can be found at:

204 <https://aspredicted.org/hrz2-9b84.pdf>.

205

## 206 **Results**

207 To investigate our first hypothesis that social facts are perceived as more mind  
208 dependent than natural facts, we conducted Hierarchical Linear Model (HLM) to examine the  
209 impact of Fact-type (i.e., social facts versus natural facts) on Mind-dependency, accounting for  
210 and exploring individual variations and topic-specific effects. Model 1 was specified with  
211 random intercepts and slopes for Fact-type across participants (Person), topics (Topics), and the

212 interaction between participants and topics, as well as by the different mind-dependency  
213 questions (Question). Model's 1 specification was as follows:

214  $Mind-Dependency \sim I + Fact-type + (Fact-type | Person) + (Fact-type | Topic) + (Fact-type |$   
215  $Person:Topic) + (Fact-type | Question).$

216 Variance analysis using Satterthwaite's method revealed significant effects of Fact-type  
217  $F(1, 24.685) = 76.845, p < .001$ . The fixed effects analysis showed that the intercept,  
218 representing the baseline response for natural facts, was significant  $b = 1.94, SE = 0.16, t(44.26)$   
219  $= 11.96, p < .001$ . Additionally and in accordance with our hypothesis, social facts had a  
220 significantly higher mind dependency score,  $b = 2.58, SE = 0.29, t(24.69) = 8.77, p < .001$   
221 compared to natural facts. In accordance, using model 1 predicted mean mind-dependency  
222 score of  $M = 1.94, p < .001, 95\% CI [1.62, 2.25]$ , for natural facts, and  $M = 4.52, p < .001, 95\%$   
223  $CI [4.09, 4.95]$ , for social facts.

224

### 225 **Bootstrap Analysis**

226 To test the hypothesis that the variance of mind dependency for social facts exceeds  
227 that for natural facts, we conducted a variance comparison of variances extracted from the  
228 model above. Subsequently, bootstrap methods were employed (parametric method, using the  
229 bootMer function from the lme4 package), involving 200 parametric simulations to estimate  
230 the variances. The bootstrap analysis supported our hypothesis, confirming the greater  
231 variability of social facts both within topics and within individuals. The mean difference in  
232 variance within individuals was  $M_{\text{difference}} = 1.37, p < .005, 95\% CI [0.858, 1.95]$ , and within  
233 topics was  $M_{\text{difference}} = 1.23, p = .059, 95\% CI [0.12, 2.63]$ . Distributions of bootstrapped  
234 variances are presented in Figure S2.

235

**Figure S2. Distribution of bootstrapped variances and 95% quantile CIs**

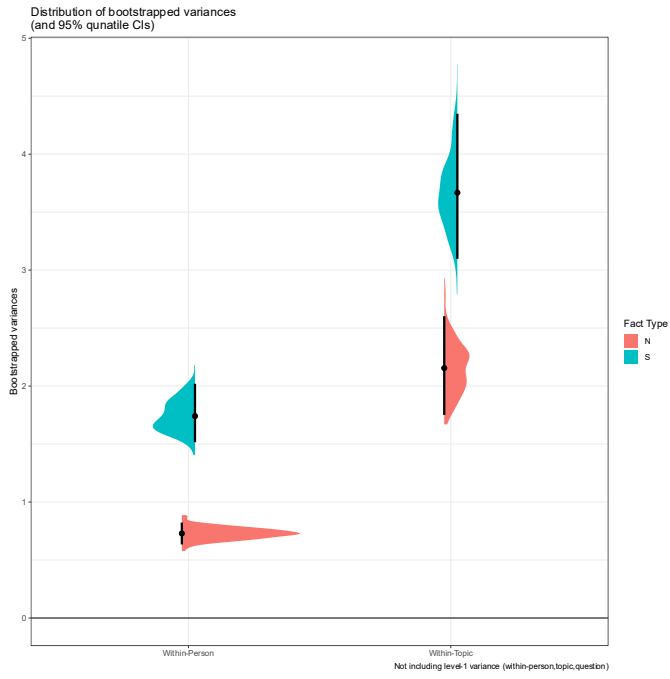

*Note.* 200 resamples were used.

236

237

238

239

240

241

242

243

244

245

246

## Study 4

247

### 248 **Methods**

#### 249 **Participants**

250 A total of 500 English-speaking participants (205 men, 295 women) were  
251 recruited through the Prolific platform. Eligibility criteria required at least 50 prior  
252 submissions and an approval rate above 95%. Participants who failed one or more  
253 attention checks ( $n = 70$ ) or the clarification questions ( $n = 69$ , 16 of whom failed both)  
254 were excluded, leaving a final analytic sample of 377 participants. All participants  
255 provided informed consent prior to participation.

#### 256 **Procedure**

257 Each participant was randomly assigned one state of affairs out of twenty,  
258 representing ten topical pairs in which each topic contained both a *social* and a *natural*  
259 version (e.g., “*Overweight people face discrimination*” vs. “*Overweight people face*  
260 *health risks*”). The complete set of topics is presented in Table S3. Participants were  
261 first instructed to explain their assigned state-of-affairs in their own words using a  
262 minimum of 50 words. Immediately afterward, they completed the mind-dependence  
263 questionnaire for that same state-of-affairs, consisting of five items assessing the extent  
264 to which the statement’s truth depends on what people think, believe, want, or desire.

265 *Coding of Explanations.* Each participant’s open-ended explanation was analysed  
266 using GPT-4o via the OpenAI Assistants API to extract continuous stance scores  
267 corresponding to Dennett’s three stances: *Physical*, *Design*, and *Intentional*. Scoring  
268 followed the pre-registered rubric (<https://aspredicted.org/6jg7xj.pdf>). Each stance was  
269 rated on a 1–7 scale, independently of the others.

#### 270 **The development of the stances prompt**

271 To generate reliable stance scores for participants’ explanations, we developed a  
272 structured prompt for GPT-4o through an iterative calibration process. The goal was to  
273 ensure that the model could accurately identify the degree to which each explanation  
274 reflected Dennett’s (1987) three cognitive stances—Physical, Design, and  
275 Intentional—when applied to short, open-ended causal accounts of social and natural  
276 state-of-affairs.

277 The development of the prompt proceeded in several stages. We first constructed a  
278 validation dataset consisting of 330 think-aloud explanations produced by 10  
279 participants in response to “what are the causes?” prompts for 33 topics (17 social, 16  
280 natural). Using an initial subset of 20 explanations, we iteratively refined the model’s

281 instructions by providing GPT-4o with detailed explanations of each stance, testing  
282 preliminary ratings, and clarifying conceptual boundaries when outputs diverged from  
283 theoretical definitions. This process yielded an initial set of structured coding  
284 instructions that defined each stance, outlined behavioral and linguistic indicators, and  
285 specified a 1–7 scoring scale for each stance independently. All model runs used  
286 temperature set to 0 to ensure deterministic output.

287 To evaluate the clarity of the initial instructions, six trained research assistants  
288 independently coded the human-produced explanations. Each excerpt was coded by  
289 two raters, with each rater evaluating approximately one-third of the dataset. Inter-rater  
290 reliability, assessed via two-way random-effects intraclass correlation coefficient  
291  $ICC_{(2,1)}$ , was moderate to good for the Physical ( $ICC = 0.70$ ) and Intentional ( $ICC =$   
292  $0.60$ ) stances, but low for the Design stance ( $ICC = 0.20$ ), reflecting conceptual  
293 challenge in distinguishing functional reasoning from mechanistic or intentional  
294 explanations.

295 We therefore conducted a calibration phase that included individual debriefing  
296 sessions with each rater, a group consensus meeting to discuss ambiguous cases, and  
297 the creation of four anchor examples exemplifying consensus ratings for each stance.  
298 These refinements substantially improved reliability in a cross-validation round in  
299 which excerpts were redistributed and coded anew by different pairs of raters.  
300 Reliability increased to  $ICC_{(2,1)} = 0.79$  for Physical,  $0.68$  for Intentional, and  $0.45$  for  
301 Design, indicating successful operationalization of the framework.

302 The final version of the coding instructions including the four anchor examples was  
303 then incorporated into a prompt used with GPT-4o for automated stance coding.  
304 Because the Design stance remained the most difficult to identify consistently, we  
305 explored several optimization strategies (e.g., varying phrasing, reordering instructions,  
306 adjusting structural cues), but none improved performance beyond including the  
307 calibrated anchors. API ratings were validated against averaged human ratings using  
308 the same  $ICC_{(2,1)}$  metric employed for inter-rater reliability, treating API ratings and  
309 averaged human ratings as two independent raters. We validated API performance on  
310 different random subsets of the data to ensure robustness. This yielded: Physical  $ICC_{(2,1)}$   
311  $= 0.82$  (95% CI [0.62, 0.90],  $p < .001$ ), Intentional  $ICC_{(2,1)} = 0.74$  (95% CI [0.57, 0.83],  
312  $p < .001$ ), and Design  $ICC_{(2,1)} = 0.53$  (95% CI [0.45, 0.60],  $p < .001$ ).

313 API-human agreement was comparable to or exceeded inter-human reliability  
314 across all three stances. For the challenging Design stance, the API achieved  $ICC =$

315 0.53 compared to human inter-rater ICC = 0.45, demonstrating that automated coding-  
 316 maintained reliability even for conceptually ambiguous distinctions. Pearson  
 317 correlations between API and averaged human ratings confirmed these patterns:  
 318 Physical  $r = 0.87$  ( $p < .001$ ), Intentional  $r = 0.79$  ( $p < .001$ ), Design  $r = 0.53$  ( $p < .001$ ).

### 319 **Analysis**

320 As pre-registered, the primary analysis examined whether adoption of the  
 321 intentional stance predicted perceived mind-dependence. To account for variability  
 322 both between and within states-of-affairs, a hierarchical linear model (HLM) was  
 323 estimated with the following specification:

$$324 \quad \text{Mind-Dependence} \sim \text{Intentional-Stance-Between} + \text{Intentional-Stance-Within} + \\
 325 \quad (\text{Intentional-Stance-Within} \mid \text{State-of-Affairs})$$

326 All analyses were conducted in R using *lmeTest* and *parameters* packages. The  
 327 simple Pearson correlations among stance variables were computed as descriptive  
 328 statistics only and were not part of the pre-registered hypothesis.

### 329 **Results**

330 The final dataset comprised 189 social and 188 natural explanations ( $N = 377$ ).  
 331 mind-dependence ratings were consistently higher for social compared with natural  
 332 statements, replicating the pattern observed in earlier studies. Number of partisans per  
 333 state-of-affairs, and means and standard deviations of mind-dependence ratings are  
 334 summarized in Table S4. Figure 1 displays the distribution of mind-dependence scores  
 335 across topics, further illustrating that social facts were judged as markedly more mind-  
 336 dependent than natural ones.

**Table S4. Mean (SD) of Mind-Dependence Scores across Topics and State-of-Affairs Type**

|              | <i>Mean</i>    | <i>Mean</i>   | <i>SD</i>      |                  | <i>N</i>       | <i>N</i>      |
|--------------|----------------|---------------|----------------|------------------|----------------|---------------|
| <i>Topic</i> | <i>Natural</i> | <i>Social</i> | <i>Natural</i> | <i>SD Social</i> | <i>Natural</i> | <i>Social</i> |
| Age of 18    | 2.65           | 3.15          | 1.70           | 1.90             | 19             | 16            |
| Dogs         | 1.28           | 4.09          | 0.71           | 1.94             | 17             | 19            |
| Females      | 1.34           | 3.56          | 0.87           | 1.82             | 24             | 19            |
| Fish         | 1.40           | 3.36          | 0.80           | 1.86             | 23             | 18            |

**Table S4. Mean (SD) of Mind-Dependence Scores across Topics and State-of-Affairs Type**

| <i>Topic</i>       | <i>Mean</i>    |               | <i>SD</i>      |                  | <i>N</i>       |               |
|--------------------|----------------|---------------|----------------|------------------|----------------|---------------|
|                    | <i>Natural</i> | <i>Social</i> | <i>Natural</i> | <i>SD Social</i> | <i>Natural</i> | <i>Social</i> |
| Flowers            | 1.74           | 4.12          | 1.71           | 1.75             | 18             | 18            |
| Identical twins    | 1.71           | 3.82          | 1.16           | 1.90             | 16             | 18            |
| Israel             | 2.27           | 4.04          | 1.69           | 2.10             | 18             | 15            |
| Overweight people  | 2.38           | 4.30          | 1.83           | 1.50             | 17             | 24            |
| Skin color         | 1.77           | 3.90          | 1.37           | 1.98             | 19             | 23            |
| When a person dies | 1.74           | 4.03          | 1.25           | 1.96             | 17             | 19            |

**Figure 2. Distribution of Mind-Dependence Scores by Topic and Fact Type**

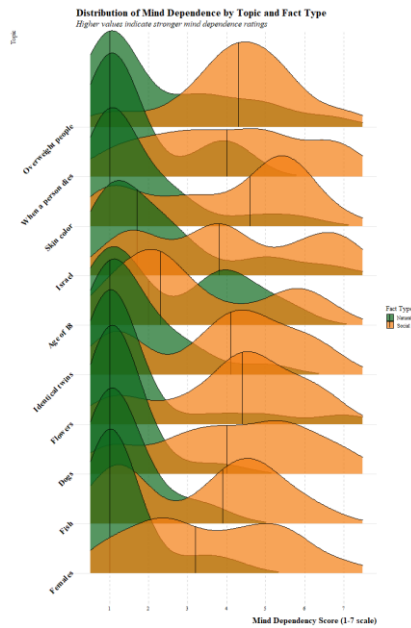

337 *Descriptive Correlations.* For descriptive purposes, we also examined simple  
 338 Pearson correlations among stance and MD scores (Figure SS).

**Figure S3. Correlation matrix of stance scores and Mind-Dependence ratings.**

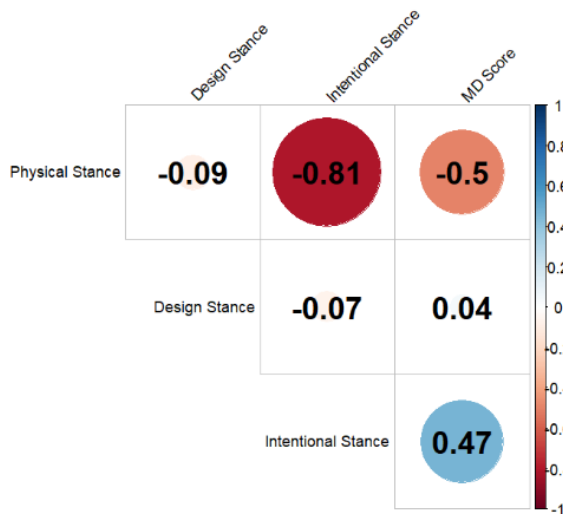

*Note.* Circle size and color indicate the magnitude and direction of Pearson correlations (blue = positive, red = negative).

339 *Hierarchical Linear Model.* Consistent with the pre-registered hypothesis, the  
 340 model revealed that adoption of the Intentional Stance positively predicted Mind-  
 341 Dependence (Table 2). Participants who tended to use more intentional reasoning  
 342 across topics also tended to judge the corresponding facts as more mind-dependent.

343 The between–state-of-affairs effect of Intentional Stance was significant ( $\beta =$   
 344 0.51,  $SE = 0.06$ , 95% CI [0.39, 0.63],  $p < .001$ ). The within–state-of-affairs effect was  
 345 smaller but remained significant ( $\beta = 0.09$ ,  $SE = 0.05$ , 95% CI [0.00, 0.18],  $p = .046$ ).

**Table S5.** Hierarchical linear model predicting *Mind-Dependence* from *Intentional Stance*

| <b>Parameter</b>             | <b>Coefficient</b> | <b>SE</b> | <b>95% CI</b> | <b><i>t</i></b> | <b><i>p</i></b> |
|------------------------------|--------------------|-----------|---------------|-----------------|-----------------|
| (Intercept)                  | 0.00               | 0.06      | [-0.12, 0.12] | 0.04            | .968            |
| Intentional Stance (between) | 0.51               | 0.06      | [0.39, 0.63]  | 9.04            | < .001          |
| Intentional Stance (within)  | 0.09               | 0.05      | [0.00, 0.18]  | 2.05            | .046            |

346

## Study 5

347

### 348 **Methods**

#### 349 **Participants**

350 The target sample for this study was 1200 participants. A total of 1628 English-  
351 speaking adults were recruited through the Prolific platform. Eligibility criteria required  
352 participants to have completed at least 50 previous submissions with an approval rate above  
353 95%. Participants who failed one or more attention or comprehension checks were replaced, in  
354 accordance with the pre-registered exclusion protocol. In total, 428 participants failed at least  
355 one of these checks, leaving a final eligible sample of 1200 participants who successfully  
356 completed the study. All participants provided informed consent prior to participation. The  
357 study's pre-registration can be accessed at: <https://aspredicted.org/h5dm37.pdf>.

#### 358 **Procedure**

359 Participants first completed a consent form and were introduced to the general purpose  
360 of the study. Each participant was randomly assigned to one of two experimental conditions:  
361 an *intentional stance* condition or a *design stance* condition. In both conditions, participants  
362 were presented with one of 20 distinct states of affairs. These 20 items were selected based on  
363 the data collection conducted in *study 6*, from which the states of affairs rated as most mind-  
364 independent were chosen for use in the current study. Each state-of-affairs was followed by a  
365 short explanatory paragraph, written in either an intentional or design frame in respect to the  
366 assigned condition. To ensure engagement, participants were asked to describe in their own  
367 words the most compelling argument from the explanation text. Following this, participants  
368 responded to three items measuring perceived unthinkability of the state-of-affairs, each rated  
369 on a 1–7 Likert scale. Next, participants completed two clarification questions and then  
370 completed five items measuring perceived mind-dependence of the state-of-affairs, again rated  
371 on 1–7 scales. Finally, participants provided basic demographic information before completing  
372 the study.

#### 373 **Results**

##### 374 *Main Analysis.*

375 Participants in the intentional stance condition reported higher perceived mind-  
376 dependence ( $M = 3.24$ ,  $SD = 1.82$ ) than those in the design stance condition ( $M = 3.01$ ,  $SD =$   
377  $1.84$ ). The mixed-effects model confirmed that this difference was statistically significant,  $B =$   
378  $0.23$ ,  $SE = 0.11$ , 95% CI  $[0.01, 0.46]$ ,  $t(18.26) = 2.15$ ,  $p = .045$ . This suggests that explanations  
379 framed in terms of intentional stance increase the perceived mind-dependence of a state-of-  
380 affairs. In contrast, the effect of condition on perceived unthinkability was not statistically  
381 significant. Although the design stance condition yielded slightly higher unthinkability scores  
382 ( $M = 4.87$ ,  $SD = 1.50$ ) compared to the intentional stance condition ( $M = 4.76$ ,  $SD = 1.46$ ), the

383 estimated effect was small and nonsignificant,  $B = -0.06$ ,  $SE = 0.10$ , 95% CI  $[-0.28, 0.16]$ ,  
384  $t(18.54) = -0.56$ ,  $p = .583$ .

385 ***Mediation Analysis.***

386 To examine whether mind-dependence mediates the effect of condition (intentional  
387 vs. design) on judgments of unthinkability, we conducted a multilevel mediation analysis with  
388 facts as a grouping variable. The analysis included 1,200 observations nested within facts.  
389 The mediator model regressed within-fact mind dependence attribution on condition. The  
390 outcome model regressed unthinkability judgments on condition, the mediator, and the fact-  
391 level mean mind dependence, with random slopes for condition and the mediator across facts.  
392 The average causal mediation effect (ACME) was small and not significant (ACME =  $-0.019$ ,  
393 95% CI  $[-0.047, 0.001]$ ,  $p = .072$ ), indicating that condition did not significantly affect  
394 unthinkability through differences in within-fact mind dependence attribution.

395

## Study 6A

396

### 397 **Methods**

#### 398 **Participants**

399 A total of 1,069 English-speaking participants were recruited through the Prolific  
400 platform. All participants were required to have completed at least 50 prior submissions with  
401 an approval rate exceeding 95%. 159 participants failed attention checks and were excluded,  
402 yielding a final eligible sample of 910 participants. All participants provided informed consent  
403 before beginning the study.

#### 404 **Procedure**

405 This study aimed to construct a comprehensive dataset of social state-of-affairs and to  
406 map their perceived structure across six conceptual dimensions of social reality. First, a corpus  
407 of 300 social facts (e.g., “*People thank others after receiving help*”) was generated. Social facts  
408 were designed to correspond systematically to the first 100 categories of the Dewey Decimal  
409 Classification System, ensuring broad coverage of domains that characterize the social reality.  
410 To fill gaps in topical representation, additional social facts were derived from a taxonomy of  
411 university faculties, resulting in a balanced set of 300 social facts.

412 In the first phase, participants were invited to rate subsets of these facts on truthfulness,  
413 confidence in truthfulness, and one of the six social dimensions (described in the measurement  
414 section). Each participant evaluated 50 social facts randomly assigned from the full list. Once  
415 each social fact reached approximately 30 ratings, facts with less than 90% agreement regarding  
416 their truth value were removed, leaving a refined corpus of 233 validated social facts. In the  
417 second phase, the remaining participants rated 50 randomly selected social facts (from the 233  
418 list) on one of the six dimensions without providing truthfulness ratings. All procedures were  
419 approved by Tel-Aviv University’s Institutional Review Board.

#### 420 **Measures**

421 Each social fact was evaluated on one of the following six dimensions, presented with a 7-  
422 point scale and examples to ensure consistent interpretation:

423 *Institutional Origin and Support.* Assesses dependence on formal institutions for existence  
424 or maintenance. (7 = Exists only because of institutional rules or authority; 1 = Exists  
425 independently of institutions.) Example (7): “Citizens are issued identification documents by  
426 their government.” Example (1): “People bring gifts when visiting someone’s home.”

427 *Hierarchical Function.* Assesses whether the fact reflects or reinforces social hierarchies  
428 or unequal power. (7 = Strongly reflects hierarchy; 1 = No implication of power or status.)

429 Example (7): “CEOs make much more money than line workers.” Example (1): “Coworkers  
430 chat with each other during breaks.”

431 *Sociopolitical Sensitivity.* Captures the degree to which the fact involves politically or  
432 emotionally charged topics. (7 = Highly sensitive or controversial; 1 = Broadly accepted and

433 neutral.) Example (7): “Many countries allow abortion.” Example (1): “People usually wait  
434 their turn in shared spaces.”

435 *Embedded Moral Valence.* Measures whether the fact involves behavior or conditions  
436 treated as morally significant. (7 = Commonly moralized; 1 = Not associated with moral  
437 evaluation.) Example (7): “People are often criticized for being unfaithful to their partners.”  
438 Example (1): “People typically eat together during major celebrations.”

439 *Scope of Application.* Assesses how broadly the fact applies within society.  
440 (7 = Applies universally; 1 = Applies narrowly.) Example (7): “All citizens are required to  
441 pay taxes.” Example (1): “Surgeons must scrub their hands for a specific duration before an  
442 operation.”

443 *Intentionality and Collective Representation.* Evaluates whether the fact exists due to  
444 collective agreement or emerges unintentionally from individual behavior. (7 = Upheld by  
445 explicit collective belief; 1 = Unintended behavioral pattern.) Example (7): “A specific day is  
446 a national holiday.” Example (1): “Cars slow down to look at an accident in another lane,  
447 causing a traffic jam.”

#### 448 **Results**

449 A mean of 27.44 participant rated the truthfulness of the social facts in the first phase.  
450 Across dimensions, Intentionality and Collective Representation and Scope of Application  
451 yielded the highest mean ratings. Sociopolitical Sensitivity received the lowest average rating.  
452 The mean number of raters per dimension per social fact ranged from 24 to 37, reflecting  
453 balanced sampling across the six dimensions (see Table S6).

**Table S6. Descriptives of Dimensions for 233 Facts Rated by 910 Participants**

| <b>Dimension</b>                             | <b>N</b> | <b>Mean</b> | <b>SD</b> |
|----------------------------------------------|----------|-------------|-----------|
| Intentionality and Collective Representation | 36.47    | 4.81        | 0.85      |
| Hierarchical Function                        | 26.16    | 3.37        | 1.05      |
| Embedded Moral Valence                       | 26.64    | 3.53        | 1.22      |
| Sociopolitical Sensitivity                   | 25.31    | 2.25        | 0.89      |
| Scope of Application                         | 25.84    | 4.90        | 0.98      |
| Institutional Origin and Support             | 23.61    | 3.66        | 1.71      |

*Note.* N is the mean number of raters per social fact.

#### 454 **Interrelations Among Social Dimensions**

455 To explore the relationships among the six dimensions, we computed Pearson  
456 correlations based on mean ratings for each of the 233 validated social facts (Figure S4).  
457 Institutionalization was strongly correlated with intentionality ( $r = .66$ ). Hierarchical Function  
458 correlated moderately with institutionalization ( $r = .44$ ); and with moral valence and

459 sociopolitical sensitivity (both;  $r = .34$ ). Moral valence was positively related to sociopolitical  
 460 sensitivity ( $r = .60$ ).

**Figure S4. Correlation matrix of mean dimension scores across 233 social facts.**

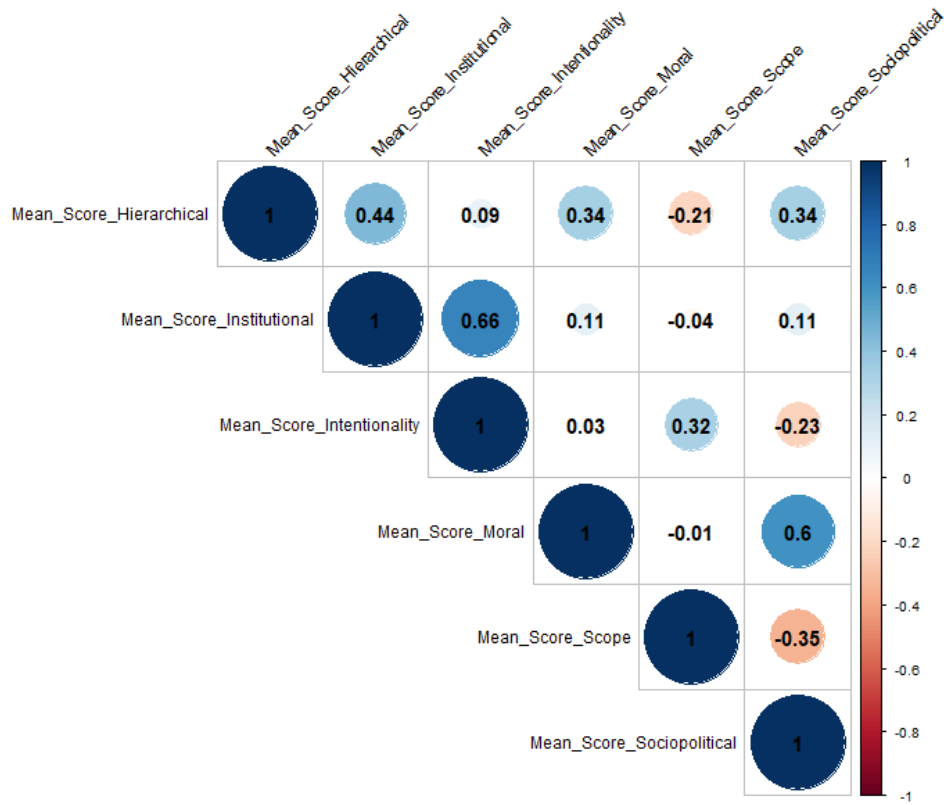

*Note.* Circle size and color indicate the magnitude and direction of Pearson correlations (blue = positive, red = negative).

461

462

463

## Studies 6B and 7

464

### 465 **Methods**

#### 466 **Participants**

467 The target sample for this study was 1,200 participants. A total of 1,719 English-  
468 speaking adults were recruited through the Prolific platform. Eligibility criteria required  
469 participants to have completed at least 50 previous submissions with an approval rate above  
470 95%. Participants who failed one or more attention or comprehension checks were replaced, in  
471 accordance with the pre-registered exclusion protocol. In total, 519 participants failed at least  
472 one of these checks, leaving a final eligible sample of 1,200 participants who successfully  
473 completed the study. All participants provided informed consent prior to participation.

#### 474 **Procedure**

475 Participants were first introduced to the study's objectives and completed a brief  
476 clarification phase designed to ensure comprehension of the task. This phase included two  
477 example scenarios, each followed by clarification questions that verified participants  
478 understood the type of evaluations they were about to perform.

479 In the main assessment, each participant evaluated five randomly selected social state-  
480 of-affairs drawn from a corpus of 200 statements, which were themselves selected from the 233  
481 validated social state-of-affairs evaluated in *study 6A*. This sampling ensured broad topical  
482 coverage while maintaining the empirical foundation established in the earlier study. For each  
483 statement, participants first rated whether they are true and their confidence in that assessment  
484 and then answered a series of questions concerning mind-dependence, essentialism, and  
485 unthinkability.

486 After completing the main assessment, participants were randomly assigned to one of  
487 several individual-differences modules, each containing a different set of measures. These  
488 included Raven's Standard Progressive Matrices (nine-item version), Schwartz Values and  
489 System Justification scales combined with the Inherency scale, the Big Five Inventory-2, or a  
490 set of items measuring Actively Open-Minded Thinking and Folk Moral Objectivism. Each  
491 module also included a brief demographic questionnaire.

492 All procedures and analytic strategies were pre-registered (see:  
493 <https://aspredicted.org/9zp4nd.pdf>). The primary objective was to evaluate how the six  
494 conceptual dimensions of social reality: scope, institutionalization, hierarchical function,  
495 sociopolitical sensitivity, moral valence, and intentionality, relate to perceived mind-  
496 dependence across a wide range of social state-of-affairs. Multilevel models were used to  
497 account for both participant-level and state-of-affairs-level variation. Secondary pre-registered  
498 analyses examined whether individual differences influence the tendency to attribute mind-  
499 dependence to social facts. All analyses were conducted in R, using the *lmerTest*, and  
500 *parameters* packages.

501 **Results**

502 *Main analysis.* The relation between each of the six social-reality dimensions and  
 503 perceived mind-dependence was evaluated using a hierarchical linear model (HLM) of the  
 504 form:

505 
$$\text{State-of-Affairs Level Mind-Dependence Score} \sim \text{Social-Reality-Dimension} + (1 + \text{Social-}$$
  
 506 
$$\text{Reality-Dimension} \mid \text{Participant})$$

507 Each model estimated the standardized fixed effect of a given dimension on mind-  
 508 dependence while accounting for random variation across participants. Standardized  
 509 coefficients for all six models are presented in Table S7. Across dimensions, two of the social-  
 510 reality characteristics: institutionalization and intentionality, showed significant negative  
 511 associations with mind-dependence. Specifically, state-of-affairs perceived as more  
 512 institutionalized were judged as less mind-dependent ( $\beta = -0.21$ ,  $SE = 0.07$ , 95% CI  $[-0.34, -$   
 513  $0.07]$ ,  $p < .005$ ), and facts characterized by higher intentionality were also associated with lower  
 514 mind-dependence ratings ( $\beta = -0.17$ ,  $SE = 0.07$ , 95% CI  $[-0.32, -0.03]$ ,  $p < .05$ ). In contrast,  
 515 moral valence showed a significant positive relation with mind-dependence ( $\beta = 0.26$ ,  $SE =$   
 516  $0.08$ , 95% CI  $[0.11, 0.41]$ ,  $p < .005$ ), indicating that morally charged social facts were perceived  
 517 as more dependent on wishes and beliefs. The remaining dimensions, i.e. hierarchical function,  
 518 sociopolitical sensitivity, and scope, did not significantly predict mind-dependence (all  $ps >$   
 519  $.25$ ).

**Table S7. Standardized coefficients for the relation between social-reality dimensions and mind-dependence.**

| Parameter      | $\beta$ | SE    | CI   | Low   | High  | t     | p       | sig. |
|----------------|---------|-------|------|-------|-------|-------|---------|------|
| Hierarchical   | 0.01    | 0.071 | 0.95 | -0.13 | 0.15  | 0.11  | 0.91    |      |
| Institutional  | -0.21   | 0.07  | 0.95 | -0.34 | -0.07 | -2.97 | < 0.005 | **   |
| Intentionality | -0.17   | 0.07  | 0.95 | -0.32 | -0.03 | -2.37 | < 0.05  | *    |
| Moral          | 0.26    | 0.08  | 0.95 | 0.11  | 0.41  | 3.38  | < 0.005 | **   |
| Sociopolitical | 0.09    | 0.08  | 0.95 | -0.07 | 0.24  | 1.17  | 0.25    |      |
| Scope          | -0.08   | 0.07  | 0.95 | -0.22 | 0.06  | -1.14 | 0.26    |      |

521 *Individual differences analysis.* The relation between each measurement of individual  
522 differences and perceived mind-dependence was evaluated using a hierarchical linear model  
523 (HLM) of the form:

524  $Participant\ Level\ Mind-Dependence\ Score \sim Measurement-Score + (1 + Measurement-Score-$   
525  $Centered || State-of-Affairs)$

526 Across the big five personality domains, conscientiousness showed a significant  
527 negative association with perceived mind-dependence ( $B = -0.44$ , 95% CI  $[-0.66, -0.22]$ ,  $p <$   
528  $.001$ ), indicating that more conscientious individuals tended to attribute less mind-dependence  
529 to social state-of-affairs. Conversely, negative emotionality was positively related to mind-  
530 dependence ( $B = 0.23$ , 95% CI  $[0.05, 0.41]$ ,  $p = .015$ ), suggesting that individuals higher in  
531 negative emotionality were more likely to view social facts as mind-dependent. No significant  
532 effects were observed for extraversion, agreeableness, or open-mindedness (all  $ps > .08$ ).

533 Facet-level analyses revealed a similar pattern; within conscientiousness, all three  
534 facets were negatively associated with perceived mind-dependence: higher organization  
535 predicted lower mind-dependence ( $B = -0.34$ , 95% CI  $[-0.52, -0.15]$ ,  $p < .001$ ), as did  
536 productiveness ( $b = -0.32$ , 95% CI  $[-0.51, -0.13]$ ,  $p = .001$ ) and responsibility ( $B = -0.37$ ,  
537 95% CI  $[-0.58, -0.16]$ ,  $p = .001$ ). For negative emotionality, all three facets were positively  
538 related to mind-dependence; anxiety ( $B = 0.19$ , 95% CI  $[0.02, 0.36]$ ,  $p = .025$ ), depression ( $B =$   
539  $0.17$ , 95% CI  $[0.01, 0.33]$ ,  $p = .042$ ), and emotional volatility ( $B = 0.20$ , 95% CI  $[0.03, 0.38]$ ,  $p$   
540  $= .020$ ). Within agreeableness, respectfulness exhibited a reliable negative association ( $B =$   
541  $-0.41$ , 95% CI  $[-0.70, -0.12]$ ,  $p = .005$ ), whereas compassion and trust were not significant  
542 (both  $p > .30$ ). Extraversion facets, sociability, assertiveness, and energy level, did not predict  
543 mind-dependence (all  $p > .17$ ). Finally, within openness to experience, intellectual curiosity  
544 showed a small, non-significant positive trend ( $B = 0.21$ ,  $p = .083$ ), while aesthetic sensitivity  
545 and creative imagination were not associated with mind-dependence (both  $p > .36$ ).

546 Among the cognitive and attitudinal measures, actively open-minded thinking (AOT)  
547 scores were unrelated to mind-dependence across all subscales (all  $ps > .25$ ). In contrast,  
548 measures of folk moral objectivism (FMO) revealed reliable positive associations; both  
549 relativism ( $B = 0.23$ , 95% CI  $[0.06, 0.40]$ ,  $p = .007$ ) and no-truth orientation ( $B = 0.25$ , 95% CI  
550  $[0.09, 0.41]$ ,  $p = .002$ ) predicted higher mind-dependence. Examining values, self-direction  
551 from the schwartz value survey showed a small but significant positive association ( $B = 0.12$ ,  
552 95% CI  $[0.00, 0.23]$ ,  $p = .048$ ). Other value dimensions, including power, achievement,  
553 hedonism, stimulation, universalism, benevolence, tradition, conformity and security, were not  
554 significantly related. Inherency did not predict mind-dependence ( $B = -0.02$ , 95% CI  $[-0.15,$   
555  $0.11]$ ,  $p = .732$ ), indicating that a general tendency to view social arrangements as inherent  
556 features of the world was unrelated to whether those arrangements were seen as mind-  
557 dependent. Likewise, system-justifying attitudes showed no reliable association ( $B = -0.03$ ,

558 95% CI [-0.12, 0.06],  $p = .501$ ), suggesting that motivation to defend existing social systems  
 559 does not extend to construing them as more or less dependent on collective mental states.  
 560 Likewise, cognitive ability, as measured by performance on the nine-item version of raven's  
 561 standard progressive matrices, was not significantly associated with perceived mind-  
 562 dependence. The fixed-effects model indicated a small, nonsignificant coefficient for raven's  
 563 score ( $B = 0.006$ , 95% CI [-0.01, 0.02],  $p = .389$ ), suggesting that general cognitive ability did  
 564 not meaningfully predict how participants perceive the extent to which social facts are mind-  
 565 dependent.

566 Finally, demographic variables showed small associations with perceived mind-  
 567 dependence. Age was a negative predictor ( $B = -0.02$ , 95% CI [-0.02, -0.01],  $p < .001$ ),  
 568 indicating that older participants tended to attribute less mind-dependence to social state-of-  
 569 affairs. In contrast, education showed a positive association ( $B = 0.10$ , 95% CI [0.04, 0.17],  $p$   
 570  $= .002$ ), suggesting that more highly educated individuals were more inclined to view social  
 571 state-of-affairs as mind-dependent. Income was unrelated to mind-dependence ( $B = -0.02$ , 95%  
 572 CI [-0.07, 0.03],  $p = .45$ ).

573 *Additional analysis.* Relation between essentialism and mind dependence within and  
 574 between topics and participants in the large sample on 1200 participants and 200 state of affairs  
 575 was assessed and presented in table S8.

**Table S8. Results of multilevel relation between essentialism and mind-dependence.**

| Parameter                                                | $\beta$ | SE   | 95% CI         | t     | df     | p      |
|----------------------------------------------------------|---------|------|----------------|-------|--------|--------|
| <i>Fixed Effects</i>                                     |         |      |                |       |        |        |
| (Intercept)                                              | 5.37    | 0.33 | (4.72, 6.02)   | 16.20 | 368.81 | < .001 |
| Eessentialising Between Participants                     | -0.26   | 0.04 | (-0.34, -0.18) | -6.73 | 944.10 | < .001 |
| Eessentialising Between State-of-affairs Mean            | -0.23   | 0.06 | (-0.36, -0.11) | -3.78 | 203.48 | < .001 |
| Eessentialising Within Participants and State-of-affairs | -0.17   | 0.02 | (-0.21, -0.13) | -8.25 | 203.64 | < .001 |

576  
 577

## Study 8

578

### 579 **Methods**

#### 580 **Participants**

581 A total of 163 English-speaking participants (67 men, 96 women) were recruited via  
582 the Prolific platform. Eligibility criteria included English as a first language, a minimum of 50  
583 prior submissions, and an approval rate above 95%. Ten participants who failed one or more  
584 attention checks and an additional thirteen participants who failed the clarification questions  
585 were excluded, resulting in a final analytic sample of 140 participants. All participants provided  
586 informed consent before beginning the study.

#### 587 **Procedure**

588 Participants evaluated six statements concerning the value of Bitcoin, Dollar bills,  
589 Shares of stock, Works of art, Diamonds, and Gold bullion. For each statement, participants  
590 first indicated whether they believed the statement “has value” to be true and rated their  
591 confidence in this judgment. Next, participants were asked to rank the six statements according  
592 to their perceived mind-dependence of value, using the five core items of the mind-dependence  
593 scale (e.g., “Rank the statements from the one whose value is most dependent on what people  
594 believe to the one whose value is least dependent on what people believe”). Finally, participants  
595 rated the same six statements, presented in random order, on how likely each was to increase,  
596 decrease, or preserve its value in the future.

#### 597 **Results**

**Table S9. Means and standard deviations of MD Scores per topic**

| Topic           | Mean Score | SD   |
|-----------------|------------|------|
| Bitcoin         | 3.83       | 1.33 |
| Shares of Stock | 3.59       | 0.96 |
| Dollar Bills    | 3.54       | 1.35 |
| Works of Art    | 3.53       | 1.43 |
| Diamonds        | 3.44       | 1.14 |
| Gold Bullion    | 3.08       | 1.22 |

598

**Figure S5.** Violin plot of Mind-dependence scores of the fact an asset holds value

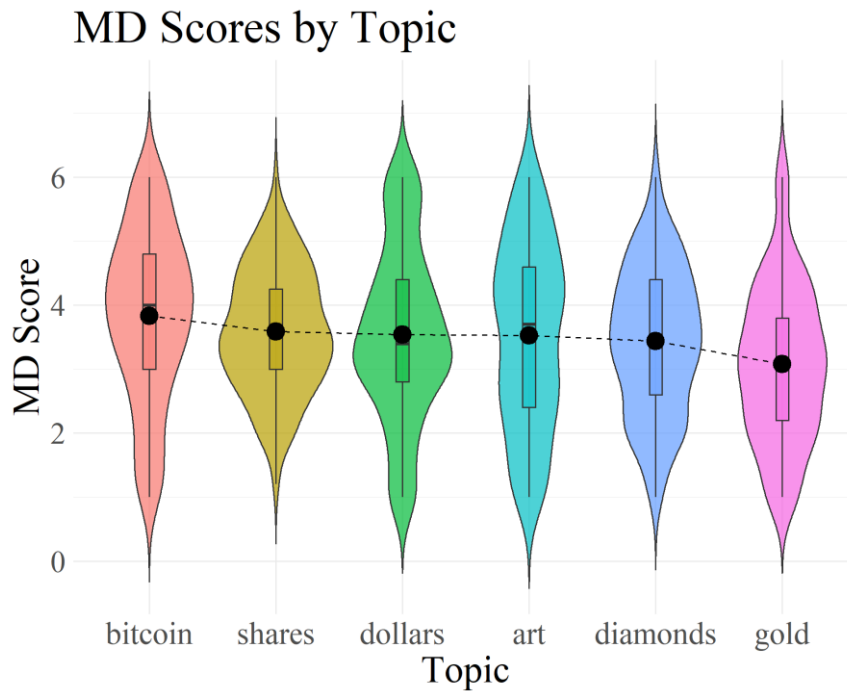

*Note.* MD Score = Mind dependence score. Point represent the mean of each asset.

599

600 To examine topic-level differences, a linear model was estimated with Topic as a  
 601 fixed factor (Bitcoin as the reference). Results revealed significant differences in perceived  
 602 mind-dependence across topics,  $F(5, 834) = 25.4, p < .001$ . Results are presented in table S10.

**Table S10. linear regression of MD predicted by Topic**

| Parameter              | Coefficient | SE   | 95% CI         | t(834) | p      |
|------------------------|-------------|------|----------------|--------|--------|
| Intercept<br>(Bitcoin) | 3.83        | 0.11 | [3.63, 4.04]   | 36.36  | < .001 |
| Shares of Stock        | -0.25       | 0.15 | [-0.54, 0.05]  | -1.65  | .100   |
| Dollar Bills           | -0.29       | 0.15 | [-0.59, 0.00]  | -1.97  | .049   |
| Works of Art           | -0.31       | 0.15 | [-0.60, -0.01] | -2.05  | .041   |
| Diamonds               | -0.40       | 0.15 | [-0.69, -0.10] | -2.65  | .008   |
| Gold Bullion           | -0.76       | 0.15 | [-1.05, -0.46] | -5.07  | < .001 |

603

604 Subsequently, we examined whether perceived mind-dependence predicted  
 605 expectations about future changes in value. Three separate linear models regressed Increase,  
 606 Decrease, and Preservation ratings on mind-dependence scores (see table 3, and figures 2-4).

607

**Table S11. Linear models Predicting Increase, Decrease, and Preservation from MD**

| N | Outcome  | Predictor       | B    | SE   | 95% CI       | t(838) | p    |
|---|----------|-----------------|------|------|--------------|--------|------|
| 1 | Increase | mind-dependence | 0.12 | 0.05 | [0.02, 0.21] | 2.48   | .013 |

|   |              |                 |       |      |                |       |        |
|---|--------------|-----------------|-------|------|----------------|-------|--------|
| 2 | Decrease     | mind-dependence | 0.35  | 0.05 | [0.26, 0.44]   | 7.72  | < .001 |
| 3 | Preservation | mind-dependence | -0.19 | 0.05 | [-0.28, -0.10] | -4.04 | < .001 |

---

608

609

610

611

612

## Study 9

613

### 614 **Methods**

#### 615 **Participants**

616 The target sample for this study was 620 participants. A total of 685 English-speaking  
617 adults were recruited through the Prolific platform. Eligibility criteria required participants to  
618 have completed at least 50 previous submissions with an approval rate above 95%. Participants  
619 who failed one or more attention or comprehension checks were replaced, in accordance with  
620 the pre-registered exclusion protocol. In total, 65 participants failed at least one of these checks,  
621 leaving a final eligible sample of 620 participants who successfully completed the study. All  
622 participants provided informed consent prior to participation.

#### 623 **Procedure**

624 Participants read a vignette describing a gentrification scenario in which a real-estate  
625 developer, Dave Green, purchases a property that ultimately leads to the displacement of a long-  
626 term tenant, Sam Coleman. To ensure comprehension of the narrative, participants completed  
627 two memory items prior to the experimental manipulation. Each item displayed a photograph  
628 and asked participants to identify whether the person depicted was the developer or the tenant.

629 The experimental manipulation followed the memory check. All participants were  
630 presented with two arguments concerning whether gentrification should be understood as mind-  
631 dependent or mind-independent. Participants assigned to the mind-dependent (MD) condition  
632 viewed one strong and one weak argument supporting the mind-dependent interpretation.  
633 Participants assigned to the mind-independent (MID) condition viewed one strong and one  
634 weak MID argument. While reading both arguments, participants were asked to label each  
635 sentence as a good or bad argument. They then indicated which of the two arguments they found  
636 more persuasive and provided an open-ended explanation of at least 20 words describing the  
637 reasoning that influenced their choice.

638 Participants subsequently completed the key dependent measures. Responsibility  
639 attribution was assessed using a 0–100 slider asking how responsible Dave Green was for the  
640 residents losing their homes. A second slider assessed the extent to which participants liked the  
641 developer, ranging from 0 (“not at all”) to 100 (“very much”). Political orientation was  
642 measured on a 1–7 scale and was included for exploratory analyses. All procedures and analytic  
643 strategies were pre-registered and can be accessed via the following link:  
644 <https://aspredicted.org/8r97tn.pdf>. Primary analysis consisted of a one-tailed independent-  
645 samples t-test predicting higher responsibility ratings in the MD condition than in the MID  
646 condition. A secondary preregistered t-test examined whether liking of the developer would be  
647 lower in the MD condition.

#### 648 **Results**

649 *Main Analysis.* The primary hypothesis concerned whether participants in the MD  
650 condition would attribute greater responsibility to the developer than those in the MID  
651 condition. Consistent with this prediction, responsibility ratings were higher in the MD  
652 condition ( $M = 79.27$ ) than in the MID condition ( $M = 75.49$ ). A one-tailed t-test confirmed that  
653 this difference was statistically significant,  $t(603.37) = 2.00, p = .023, 95\% \text{ CI } [0.67, \infty]$ . The  
654 effect size indicated a small difference in the predicted direction, Cohen's  $d = -0.16, 95\% \text{ CI}$   
655  $[-0.32, -0.00]$ .

656 *Secondary analysis.* The preregistered secondary hypothesis predicted that liking of the  
657 developer would be lower in the MD condition. This prediction was also supported. Participants  
658 in the MD condition reported significantly lower liking ( $M = 22.39$ ) than those in the MID  
659 condition ( $M = 27.89$ ). A one-tailed t-test indicated that this difference was significant,  
660  $t(603.53) = -2.81, p = .003, 95\% \text{ CI } [-\infty, -2.27]$ . The effect size was small, Cohen's  $d = 0.23,$   
661  $95\% \text{ CI } [0.07, 0.38]$ , suggesting that presenting the scenario as mind-dependent not only  
662 increased perceived responsibility but also reduced affective evaluations of the developer.

663 *Mediation Analysis.* To examine whether responsibility attribution mediated the effect  
664 of condition (MID  $\rightarrow$  MD) on liking of the developer, we estimated a mediation model using  
665 structural equation modelling with standardized coefficients. Confidence intervals were derived  
666 from the bootstrap distribution (1,000 resamples). Results indicated that condition significantly  
667 predicted liking of the developer, such that moving from the MID condition to the MD condition  
668 was associated with lower liking ( $\beta = -.08, SE = .04, 95\% \text{ CI } [-.16, -.01], p = .028$ ). Condition  
669 also significantly predicted responsibility attribution, with participants in the MD condition  
670 attributing greater responsibility to the developer ( $\beta = .08, SE = .04, 95\% \text{ CI } [.00, .16], p =$   
671  $.040$ ). In turn, higher responsibility attribution was strongly associated with lower liking of the  
672 developer ( $\beta = -.35, SE = .05, 95\% \text{ CI } [-.44, -.27], p < .001$ ). The indirect effect of condition  
673 on liking via responsibility attribution was statistically significant ( $\beta = -.03, SE = .01, p = .049,$   
674  $95\% \text{ CI } [-.06, .00]$ ), indicating potential partial mediation. The total effect of condition on  
675 liking was also significant ( $\beta = -.11, SE = .04, 95\% \text{ CI } [-.19, -.03], p < .005$ ). Together, these  
676 results suggest that framing the scenario as more mind-dependent reduces liking of the  
677 developer in part by increasing perceived responsibility, while a substantial portion of the effect  
678 remains direct.

679

## 680 **References**

- 681 1. Everett, J. A. C. The 12 Item Social and Economic Conservatism Scale (SECS). *PLoS*  
682 *One* **8**, e82131 (2013).
- 683 2. DeYoung, C. G., Quilty, L. C. & Peterson, J. B. Between facets and domains: 10  
684 aspects of the Big Five. *J. Pers. Soc. Psychol.* **93**, 880–896 (2007).

685
